# Supplementary material
Source: Research Square preprint supplement (doi:10.21203/rs.3.rs-9794037/v1)
Supplement: Supplementary file 1 [file e605015d30f7565837a59742.docx]

**Supplemental Material**

**Urban Shade Shelter and Reduction in Heat-Related Mortality Across 25 Districts of Seoul, South Korea**

Authors: Ayoung Kim1)†, Jisung Choi1) †, Seohyeon Park1), Cinoo Kang2), Ejin Kim2), Ho Kim1) 2)*

**Table of Contents**

Supplemental Fig. 1 Spatial Distribution Maps among fixed folding shade shelters (left) and smart shade shelters (right)

Supplemental Fig. 2 Annual averaged number of shade shelters per district from 2017 to 2022

**Supplemental Table 1 Results of Sensitivity analyses with other model specifications and thresholds**


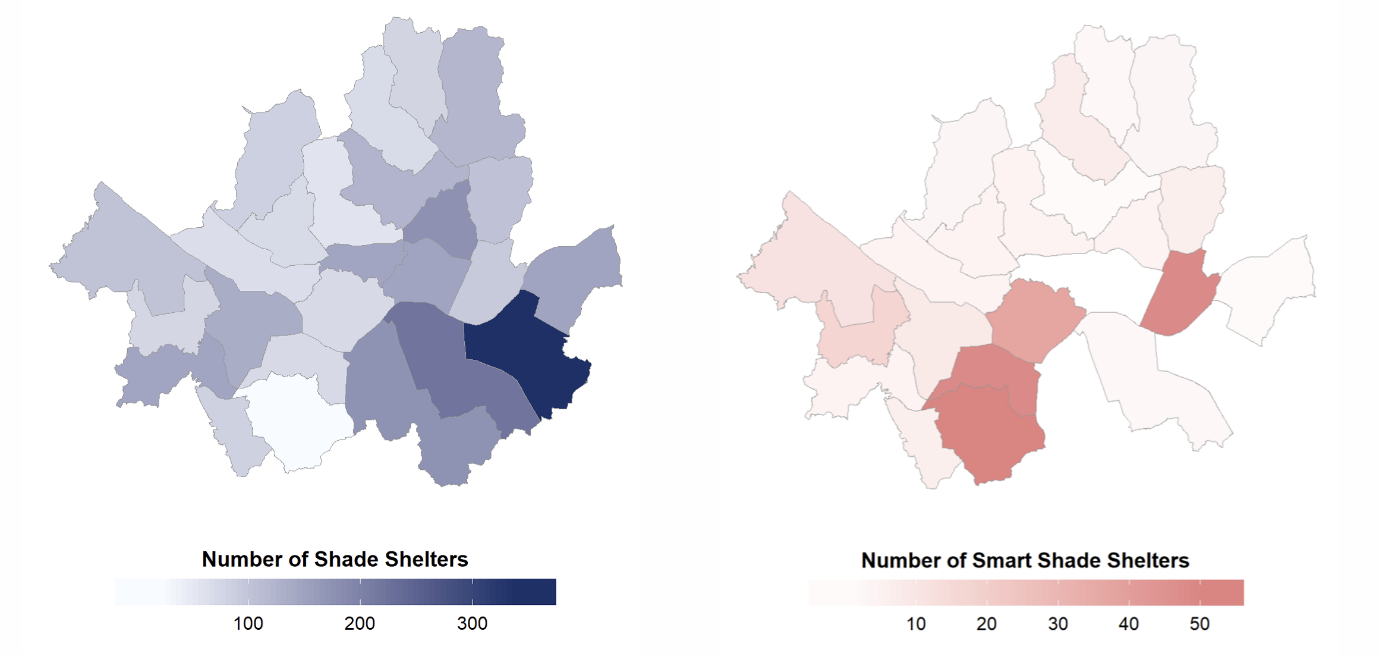
**Supplemental Fig. 1** Spatial Distribution Maps among fixed folding shade shelters (left) and smart shade shelters (right)


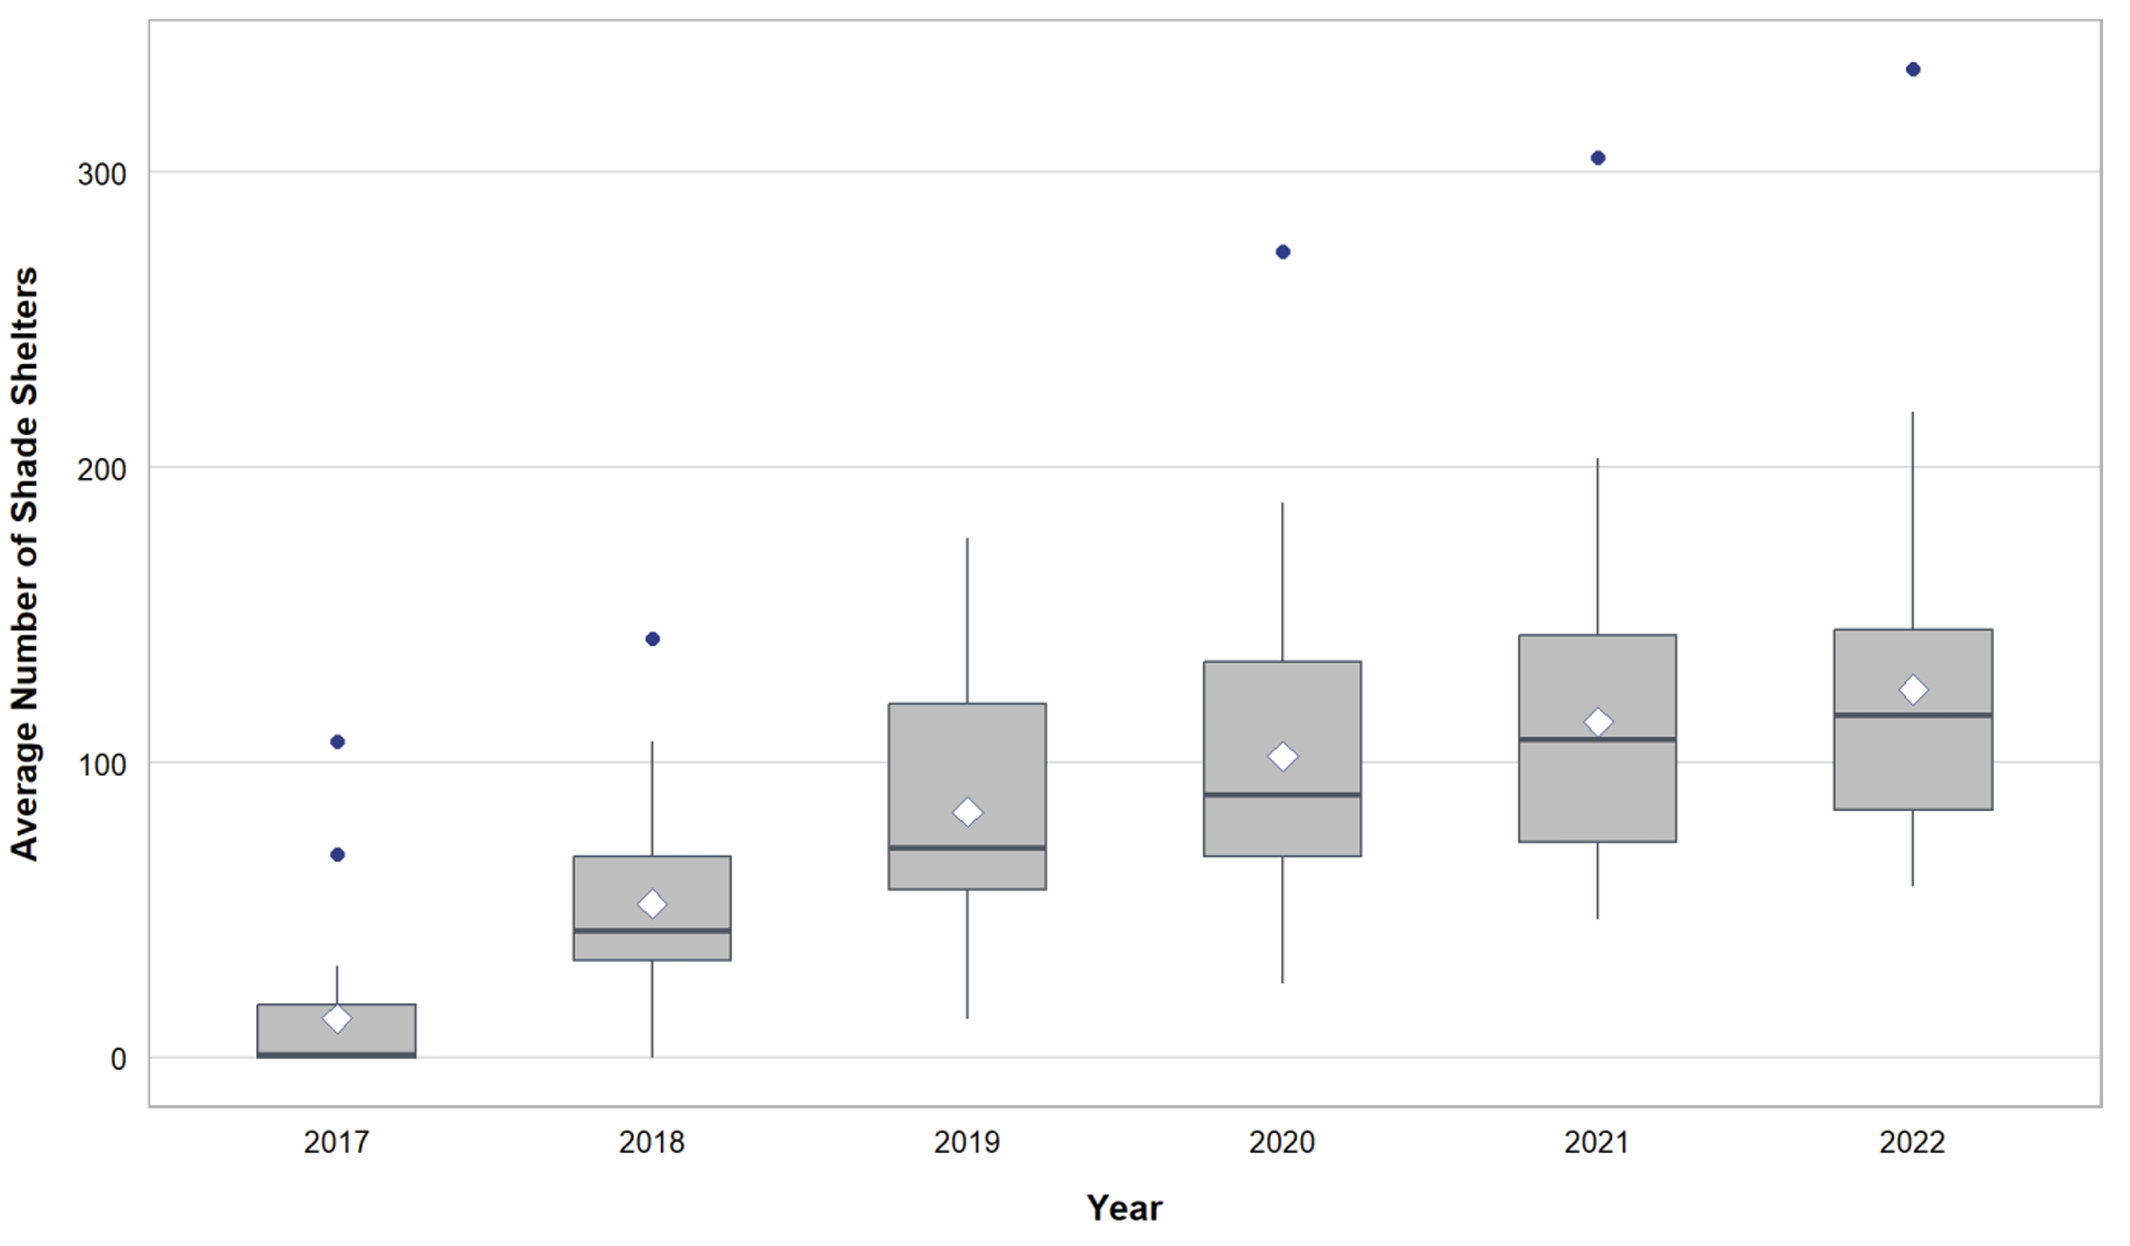


**Supplemental Fig. 2** Annual averaged number of shade shelters per district from 2017 to 2022

| **Specification** | **Relative Risk (95% CI)** | |
| --- | --- | --- |
| **Low Shade Infrastructure** | **High Shade Infrastructure** |
| Main model | 1.128  (1.003-1.269) | 1.073  (0.982-1.173) |
| Knot positions: 25th/75th percentiles. | 1.117  (1.010-1.235) | 1.063  (0.985-1.147) |
| Lag structure: maximum lag period to 7 days | 1.145  (1.004-1.307) | 1.088  (0.985-1.204) |
| Shade shelter density: 10th and 90th percentiles of shade shelter density | 1.132  (1.001-1.280) | 1.057  (0.956-1.168) |

**Supplemental Table 1** Results ofSensitivity analyses with other model specifications and thresholds
